# Supplementary material
Source: publisher figshare collection journal article supplement (https://frontiersin.figshare.com/ndownloader/files/15261077)
Supplement: Supplementary file [file 15261077]

## SUPPLEMENTARY MATERIAL

Figure S1. Representative photomicrographs of lung parenchyma stained with hematoxylin-eosin (HE). Original magnification:  $\times 1000$ . Note increased number of neutrophils in ELA-SAL group (compared to C-SAL) and a further increase after exacerbation (arrows) (ELA-LPS group).

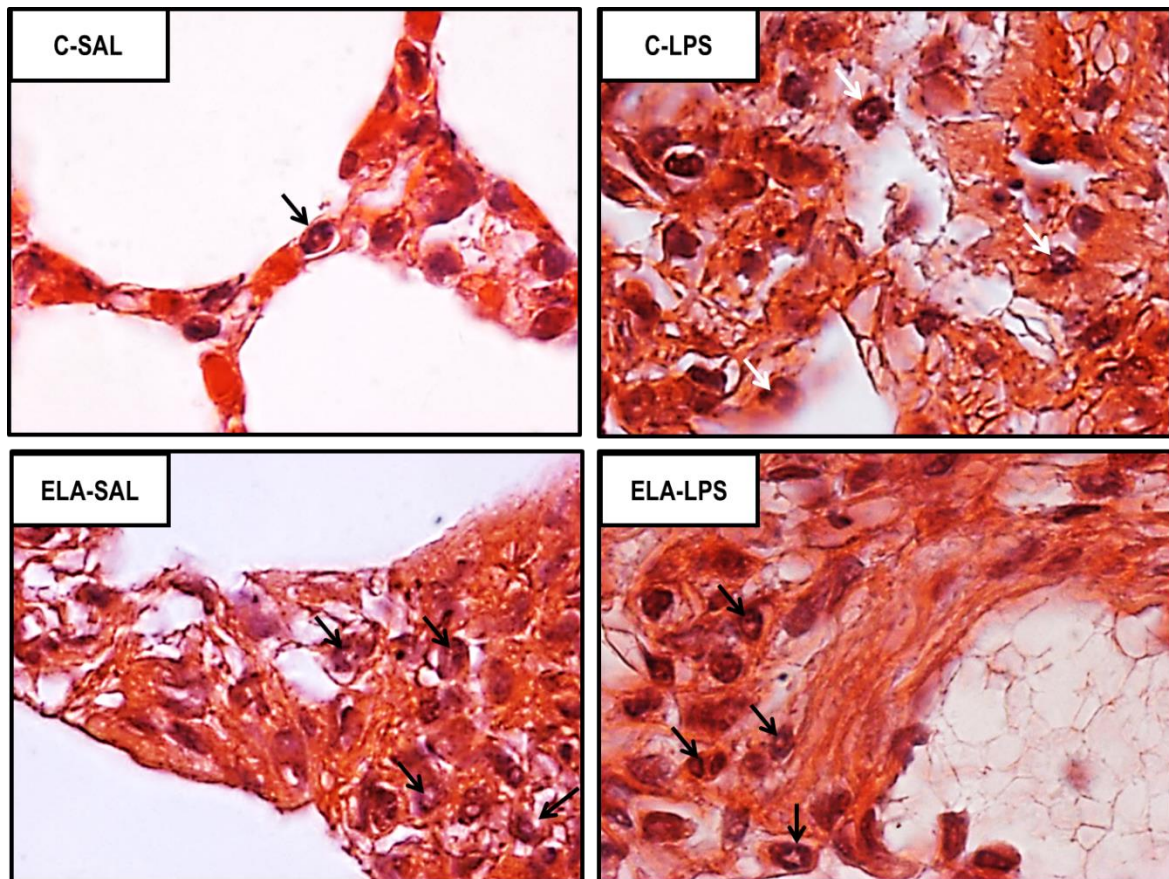

Figure S2: Computed tomography scans (A) and analysis of Hounsfield units (HU), lung volume (mm<sup>3</sup>), and specific gravity in INITIAL, ELA, and ELA-LPS conditions (B).

\*Significantly different from INITIAL ( $p < 0.05$ ). #Significantly different from ELA group ( $p < 0.05$ ).

**A**

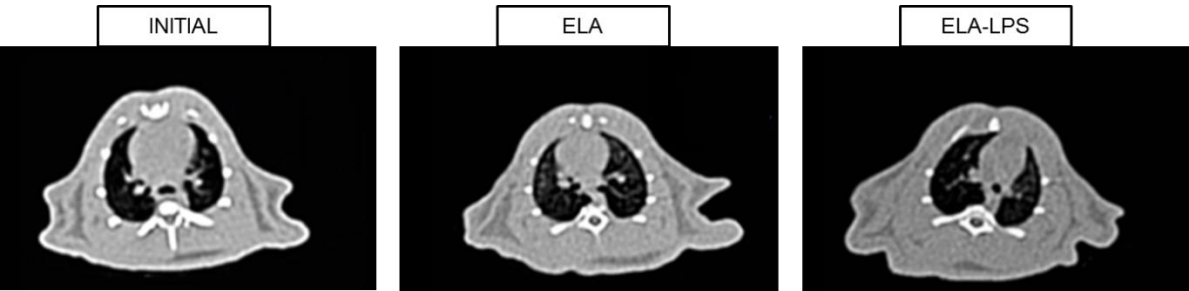

**B**

|                                | INITIAL        | ELA              | ELA-LPS         |
|--------------------------------|----------------|------------------|-----------------|
| CT numbers (Hounsfield units)  | -579.6 ± 69.2  | -921.2 ± 49.9 *  | -796.8 ± 58.6 # |
| Lung volume (mm <sup>3</sup> ) | 1758.7 ± 386.2 | 5312.0 ± 451.8 * | 5350.5 ± 754.2  |
| Specific gravity               | 0.35 ± 0.03    | 0.49 ± 0.03 *    | 0.82 ± 0.10 #   |

Figure S3: Representative images of pulmonary blood flow on echocardiography (A) and analysis of PAT/PET, right ventricular end-diastolic area, and diastolic right ventricular wall thickness (B). \*Significantly different from INITIAL ( $p < 0.05$ ). #Significantly different from ELA group ( $p < 0.05$ ).

A

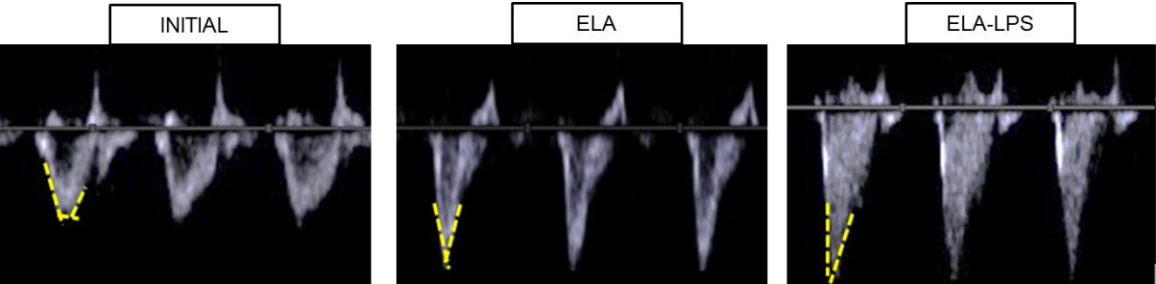

B

|                                                         | INITIAL         | ELA               | ELA-LPS           |
|---------------------------------------------------------|-----------------|-------------------|-------------------|
| PAT/PET                                                 | $0.48 \pm 0.03$ | $0.34 \pm 0.02$ * | $0.21 \pm 0.04$ # |
| Right ventricular end-diastolic area (cm <sup>2</sup> ) | $0.30 \pm 0.02$ | $0.51 \pm 0.02$ * | $0.50 \pm 0.02$   |
| Diastolic right ventricular wall thickness (mm)         | $0.05 \pm 0.01$ | $0.12 \pm 0.01$ * | $0.15 \pm 0.06$   |
